# Supplementary material for: Reefal ostracod assemblages from the Zanzibar Archipelago (Tanzania)
Source: Copernicus journal article supplement (doi:10.5194/bg-21-3523-2024), 2024-08-06
Supplement: Supplementary file 1 [file bg-21-3523-2024-supplement.pdf]

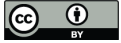

*Supplement of*

## **Reefal ostracod assemblages from the Zanzibar Archipelago (Tanzania)**

**Skye Yunshu Tian et al.**

*Correspondence to:* Skye Yunshu Tian ([skyeystian@gmail.com](mailto:skyeystian@gmail.com)) and Martin Langer ([martin.langer@uni-bonn.de](mailto:martin.langer@uni-bonn.de))

The copyright of individual parts of the supplement might differ from the article licence.

Table S1. A general description of the studied sites for their geographic location, water depth, and sampling date.

| Location        | Island   | Depth<br>(m) | Longitude | Latitude | Sampling date |
|-----------------|----------|--------------|-----------|----------|---------------|
| Haramu Passage  | Pemba    | 20           | 39.6280   | -5.0946  | March 2005    |
| Haramu Passage  | Pemba    | 30           | 39.6280   | -5.0946  | March 2005    |
| Kokota Reef     | Pemba    | 25           | 39.6472   | -5.1311  | March 2005    |
| Kokota Reef     | Pemba    | 16           | 39.6472   | -5.1311  | March 2005    |
| Mapenduzi wall  | Pemba    | 40           | 39.6026   | -5.2334  | March 2005    |
| Mapenduzi wall  | Pemba    | 42           | 39.6026   | -5.2334  | March 2005    |
| Misali Island   | Pemba    | 20           | 39.5918   | -5.2456  | March 2005    |
| Ras Nungwi peak | Zanzibar | 12           | 39.3192   | -5.7225  | March 2005    |
| Ras Nungwi peak | Zanzibar | 12-14        | 39.3192   | -5.7225  | March 2005    |
| Ras Nungwi peak | Zanzibar | 20           | 39.3192   | -5.7225  | March 2005    |
| Ras Nungwi      | Zanzibar | 16           | 39.3425   | -5.7481  | March 2005    |
| Ras Nungwi      | Zanzibar | 20           | 39.3425   | -5.7481  | March 2005    |
| Mnemba Atoll    | Zanzibar | 30           | 39.3939   | -5.8489  | March 2005    |
| Ocean Paradise  | Zanzibar | 3            | 39.3642   | -5.9183  | March 2005    |
| Bawe Island     | Zanzibar | 9-30         | 39.1408   | -6.135   | March 2005    |
| Bawe Island     | Zanzibar | 9-30         | 39.1408   | -6.135   | March 2005    |
| Stone Town      | Zanzibar | 12           | 39.1474   | -6.2137  | March 2005    |
| Stone Town      | Zanzibar | 20           | 39.1474   | -6.2137  | March 2005    |
| Menai Bay       | Zanzibar | 1            | 39.3719   | -6.3236  | March 2005    |
| Kizimkazi Beach | Zanzibar | 1            | 39.46     | -6.4381  | March 2005    |
| Mafia outside   | Mafia    | 21           | 39.828    | -7.9179  | March 2012    |
| Mafia outside   | Mafia    | 20           | 39.8224   | -7.9221  | March 2012    |
| Chole Bay 1     | Mafia    | 18-21        | 39.8173   | -7.9414  | March 2012    |
| Chole Bay 2     | Mafia    | 15-18        | 39.7871   | -7.9483  | March 2012    |
| Chole Bay 2     | Mafia    | 20           | 39.786    | -7.9491  | March 2012    |
| Mafia Lodge     | Mafia    | 0-3          | 39.7479   | -7.9734  | March 2012    |

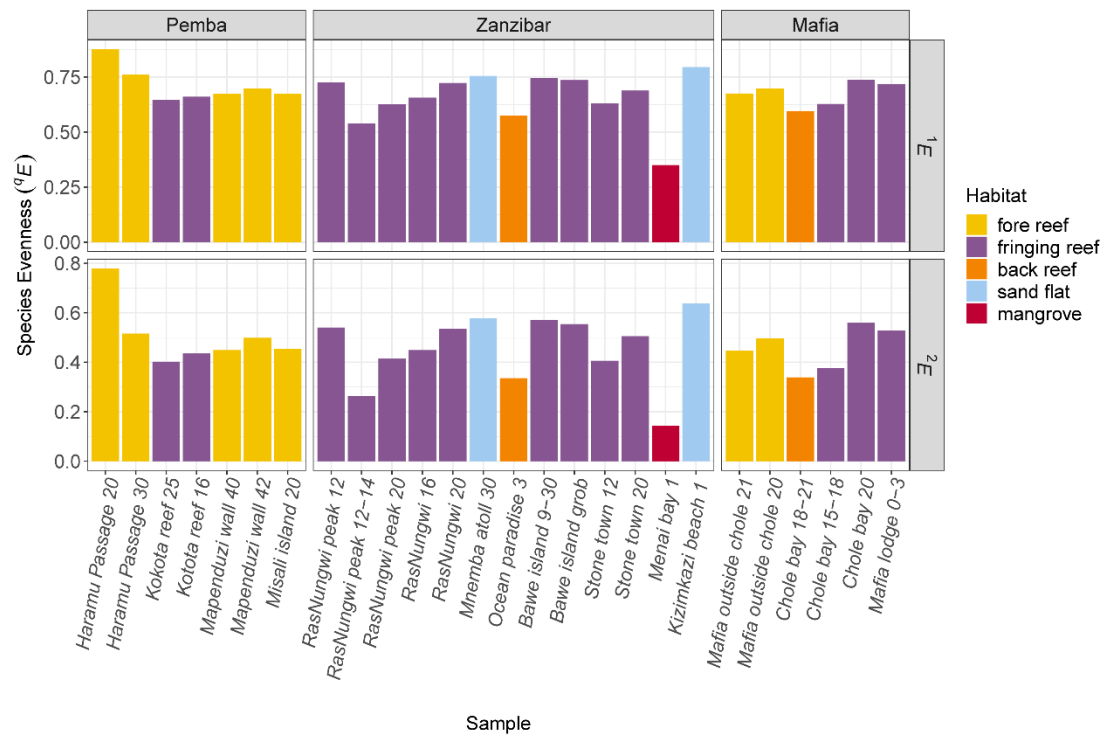

Fig. S1. Evenness as the normalized slope of Hill number profile for order  $q=1$  (top) and order  $q=2$  (bottom) based on 82.5% sample coverage. Color scheme shows habitat type.

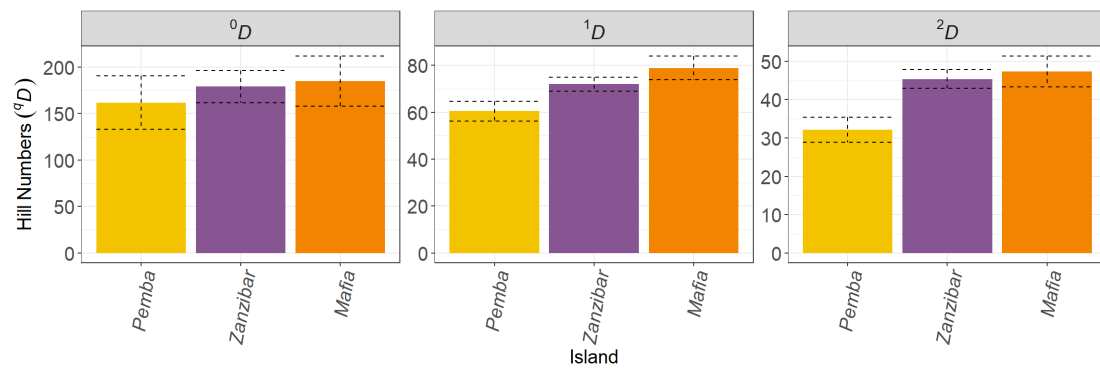

Fig. S2. Gamma diversity of each island shown by Hill numbers  ${}^0D$ ,  ${}^1D$  and  ${}^2D$  based on 98.6% sample coverage.

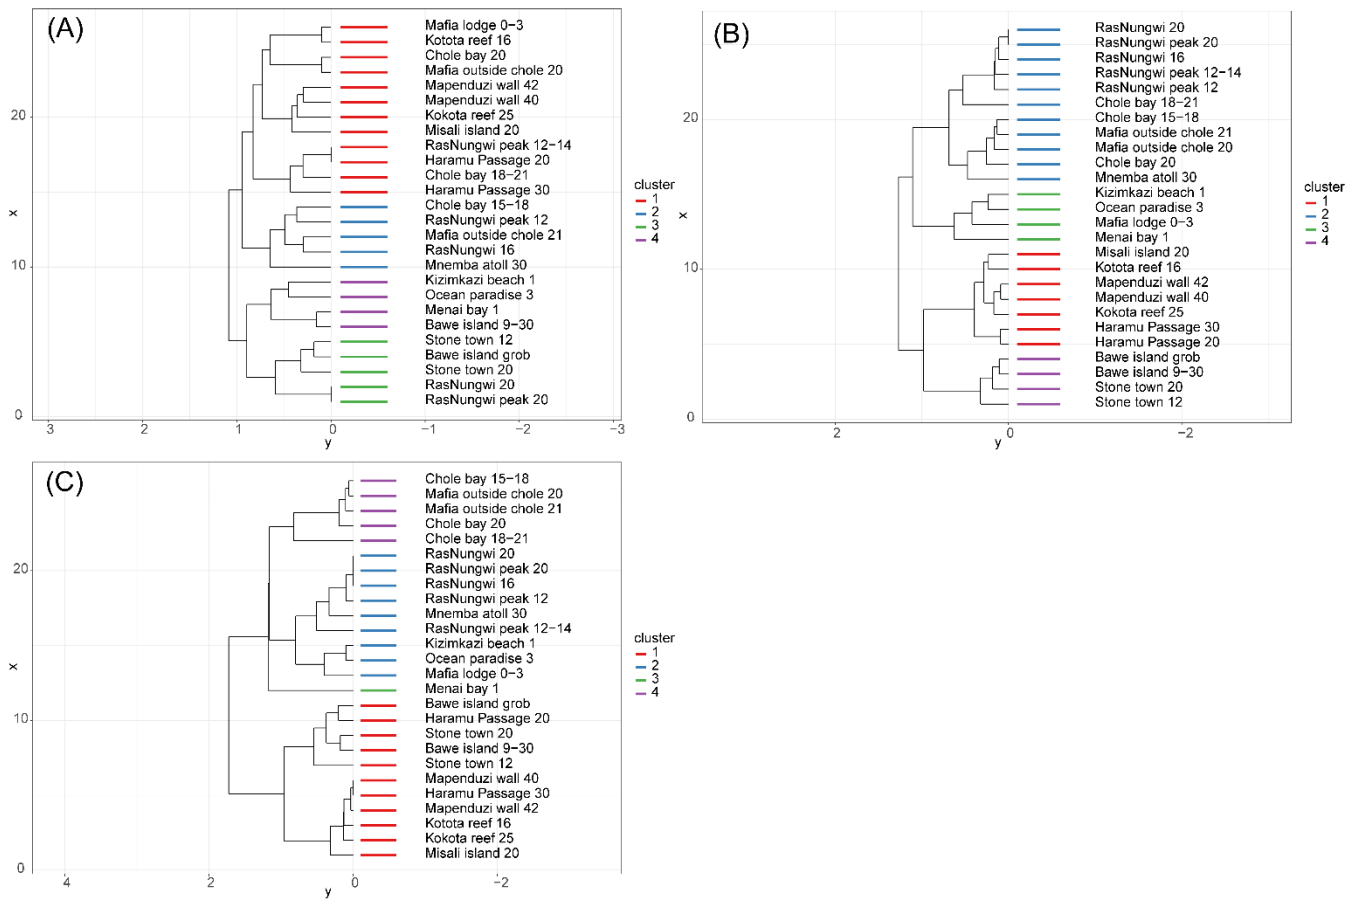

Fig. S3. Ward's minimum variance cluster dendrograms showing the separation of four biofacies based on (A) Sørensen, (B) Horn, and (C) Morisita-Horn dissimilarities. Note that the color schemes are independent among panels; thus, the biofacies based on different dissimilarities are not necessarily related.

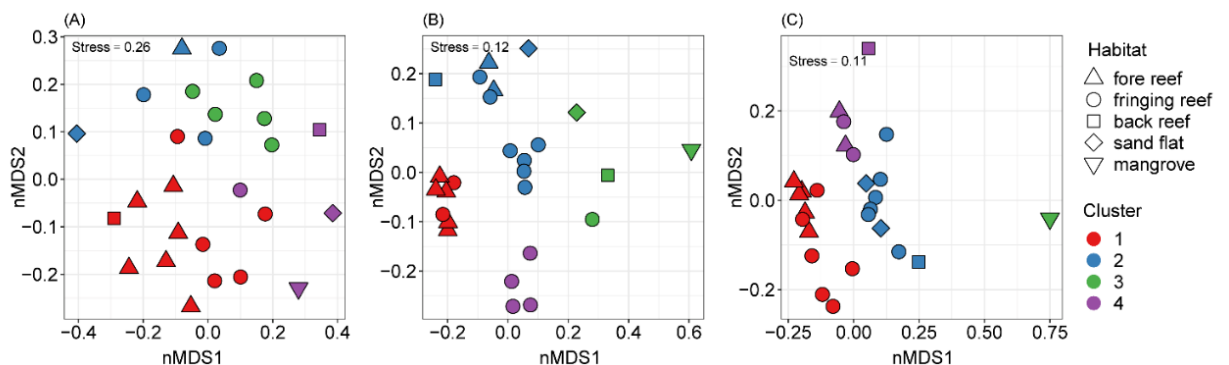

Fig. S4. nMDS ordinations showing biofacies based on (A) Sørensen, (B) Horn, and (C) Morisita-Horn dissimilarities and Ward's minimum variance cluster analysis. Cluster and habitat are represented by color and shape as in the legends, respectively. Note that the color schemes are independent among panels; thus, the biofacies based on different

dissimilarities are not necessarily related.
